CORRECTION

## Correction: Core competencies to prepare health professionals to respond to the climate crisis

Cecilia Sorensen, Haley Campbell, Anneliese Depoux, Madelon Finkel, Robyn Gilden, Kristie Hadley, Dana Haine, Gilma Mantilla, Ruth McDermott-Levy, Teddie M. Potter, Todd L. Sack, SanYuMay Tun, Caroline Wellbery

There is an error in reference 1. The correct reference is: Tun S. and Martin T. 2022. Education for Sustainable Healthcare - A curriculum for the UK. Medical Schools Council, London, UK. [https://www.medschools.ac.uk/media/2949/education-for-sustainable-healthcare\\_a-curriculum-for-the-uk\\_20220506.pdf](https://www.medschools.ac.uk/media/2949/education-for-sustainable-healthcare_a-curriculum-for-the-uk_20220506.pdf)

### Reference

1. Sorensen C, Campbell H, Depoux A, Finkel M, Gilden R, Hadley K, et al. Core competencies to prepare health professionals to respond to the climate crisis. PLOS Clim. 2023;2(6):e0000230. <https://doi.org/10.1371/journal.pclm.0000230>

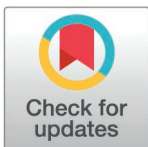

### OPEN ACCESS

**Citation:** Sorensen C, Campbell H, Depoux A, Finkel M, Gilden R, Hadley K, et al. (2025) Correction: Core competencies to prepare health professionals to respond to the climate crisis. PLOS Clim 4(10): e0000725. <https://doi.org/10.1371/journal.pclm.0000725>

**Published:** October 9, 2025

**Copyright:** © 2025 Sorensen et al. This is an open access article distributed under the terms of the [Creative Commons Attribution License](https://creativecommons.org/licenses/by/4.0/), which permits unrestricted use, distribution, and reproduction in any medium, provided the original author and source are credited.
